# Supplementary material
Source: MDPI journal article supplement (https://www.mdpi.com/2079-9284/11/1/5)
Supplement: s1 [file s1]

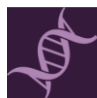

## Supplementary Tables

Table S1. Skin biophysical parameters in subjects  $\geq 38$  vs.  $< 38$  years.

| Parameter                         | Subjects $\geq 38$<br>(n = 20) | Subjects $< 38$<br>(n = 24) | p            |
|-----------------------------------|--------------------------------|-----------------------------|--------------|
| <b>Smoothness (Sesm)</b>          |                                |                             |              |
| Forearm                           | 256.83 $\pm$ 78.07             | 226.00 $\pm$ 70.27          | 0.176        |
| Cheek                             | 333.88 $\pm$ 116.35            | 360.05 $\pm$ 123.68         | 0.239        |
| Palm                              | 392.92 $\pm$ 182.43            | 420.92 $\pm$ 124.56         | 0.550        |
| <b>Roughness (Ser)</b>            |                                |                             |              |
| Forearm                           | 2.28 $\pm$ 1.70                | 2.6 $\pm$ 1.76              | 0.544        |
| Cheek                             | 3.61 $\pm$ 2.42                | 3.66 $\pm$ 2.46             | 0.945        |
| Palm                              | 3.32 $\pm$ 1.71                | 2.87 $\pm$ 1.25             | 0.316        |
| <b>Desquamation (Sesc)</b>        |                                |                             |              |
| Forearm                           | 0.65 $\pm$ 1.15                | 0.13 $\pm$ 0.16             | 0.058        |
| Cheek                             | 0.81 $\pm$ 1.19                | 0.60 $\pm$ 1.22             | 0.569        |
| Palm                              | 0.11 $\pm$ 0.23                | 0.06 $\pm$ 0.15             | 0.435        |
| <b>Wrinkles (Sew)</b>             |                                |                             |              |
| Forearm                           | 80.96 $\pm$ 25.36              | 76.65 $\pm$ 23.80           | 0.564        |
| Cheek                             | 109.15 $\pm$ 37.85             | 122.3 $\pm$ 48.59           | 0.319        |
| Palm                              | 256.49 $\pm$ 182.05            | 284.85 $\pm$ 90.15          | 0.531        |
| <b>Surface area (%)</b>           |                                |                             |              |
| Forearm                           | 636.5 $\pm$ 90.31              | 607.38 $\pm$ 63.96          | 0.219        |
| Cheek                             | 680.73 $\pm$ 143.99            | 654.99 $\pm$ 104.52         | 0.497        |
| Palm                              | 506.21 $\pm$ 98.01             | 452.76 $\pm$ 49.14          | <b>0.035</b> |
| <b>Volume (mm<sup>3</sup>)</b>    |                                |                             |              |
| Forearm                           | 93.5 $\pm$ 15.13               | 88.70 $\pm$ 15.76           | 0.312        |
| Cheek                             | 109.44 $\pm$ 10.53             | 103.42 $\pm$ 14.09          | 0.122        |
| Palm                              | 83.19 $\pm$ 19.86              | 84.00 $\pm$ 22.66           | 0.902        |
| <b>Contrast (AU)</b>              |                                |                             |              |
| Forearm                           | 1.17 $\pm$ 0.37                | 1.02 $\pm$ 0.25             | 0.128        |
| Cheek                             | 1.22 $\pm$ 0.43                | 1.23 $\pm$ 0.44             | 0.954        |
| Palm                              | 0.76 $\pm$ 0.36                | 0.58 $\pm$ 0.12             | <b>0.031</b> |
| <b>Variance (AU)</b>              |                                |                             |              |
| Forearm                           | 4.47 $\pm$ 0.83                | 4.14 $\pm$ 0.66             | 0.142        |
| Cheek                             | 4.71 $\pm$ 1.15                | 4.51 $\pm$ 0.89             | 0.526        |
| Palm                              | 3.11 $\pm$ 0.89                | 2.63 $\pm$ 0.42             | <b>0.037</b> |
| <b>Homogeneity (AU)</b>           |                                |                             |              |
| Forearm                           | 1.38 $\pm$ 0.06                | 1.41 $\pm$ 0.06             | 0.198        |
| Cheek                             | 1.38 $\pm$ 0.07                | 1.38 $\pm$ 0.07             | 0.864        |
| Palm                              | 1.5 $\pm$ 0.08                 | 1.55 $\pm$ 0.04             | <b>0.011</b> |
| <b>Anisotropy (AU)</b>            |                                |                             |              |
| Forearm                           | 34.39 $\pm$ 10.37              | 33.57 $\pm$ 12.72           | 0.819        |
| Cheek                             | 28.79 $\pm$ 2.83               | 29.72 $\pm$ 10.05           | 0.815        |
| Palm                              | 33.24 $\pm$ 12.66              | 41.17 $\pm$ 16.19           | 0.075        |
| <b>Total number of cells (AU)</b> |                                |                             |              |
| Forearm                           | 118.9 $\pm$ 33.27              | 121.79 $\pm$ 27.14          | 0.752        |
| Cheek                             | 70.05 $\pm$ 20.73              | 63.29 $\pm$ 21.48           | 0.297        |
| Palm                              | 86.25 $\pm$ 30.03              | 84.08 $\pm$ 24.70           | 0.794        |
| <b>Hardness (AU)</b>              |                                |                             |              |
| Forearm                           | 9.42 $\pm$ 4.02                | 9.46 $\pm$ 4.03             | 0.969        |

|                           |                 |                 |              |
|---------------------------|-----------------|-----------------|--------------|
| Cheek                     | 7.82 ± 3.25     | 8.05 ± 3.10     | 0.810        |
| Palm                      | 14.16 ± 3.84    | 12.45 ± 5.41    | 0.229        |
| <b>Friction (AU)</b>      |                 |                 |              |
| Forearm                   | 179.45 ± 91.83  | 166.18 ± 93.30  | 0.638        |
| Cheek                     | 97.24 ± 56.67   | 138.30 ± 87.36  | 0.165        |
| Palm                      | 181.88 ± 138.25 | 392.31 ± 279.69 | <b>0.003</b> |
| <b>Brightness (AU)</b>    |                 |                 |              |
| Forearm                   | 7.21 ± 0.96     | 9.31 ± 11.27    | 0.371        |
| Cheek                     | 7.41 ± 1.42     | 7.03 ± 1.19     | 0.340        |
| Palm                      | 8.19 ± 1.32     | 6.93 ± 1.16     | <b>0.002</b> |
| <b>Deformability (mm)</b> |                 |                 |              |
| Forearm                   | 1.57 ± 0.38     | 1.51 ± 0.32     | 0.579        |
| Cheek                     | 1.87 ± 0.29     | 1.91 ± 0.22     | 0.692        |
| Palm                      | 1.23 ± 0.21     | 1.34 ± 0.29     | 0.159        |
| <b>Flaking index (%)</b>  |                 |                 |              |
| Forearm                   | 34.99 ± 6.52    | 29.39 ± 8.70    | <b>0.022</b> |
| Cheek                     | 22.05 ± 7.37    | 30.27 ± 13.65   | <b>0.015</b> |
| Palm                      | 13.20 ± 5.83    | 9.78 ± 7.80     | 0.113        |

p value based on Student's t-test for independent samples comparing the values of biophysical skin parameters between subjects ≥ 38 and < 38 years.

Table S2. Skin biophysical parameters in males vs. females.

| Parameter                  | Male (n = 15)   | Female (n = 29) | p            |
|----------------------------|-----------------|-----------------|--------------|
| <b>Smoothness (Sesm)</b>   |                 |                 |              |
| Forearm                    | 209.34 ± 47.78  | 255.00 ± 81.58  | <b>0.022</b> |
| Cheek                      | 382.86 ± 136.49 | 330.21 ± 108.72 | 0.170        |
| Palm                       | 381.27 ± 118.86 | 22.12 ± 167.67  | 0.355        |
| <b>Roughness (Ser)</b>     |                 |                 |              |
| Forearm                    | 3.63 ± 2.28     | 1.84 ± 0.90     | <b>0.010</b> |
| Cheek                      | 3.97 ± 2.27     | 3.47 ± 2.27     | 0.482        |
| Palm                       | 2.40 ± 1.09     | 3.42 ± 1.45     | <b>0.016</b> |
| <b>Desquamation (Sesc)</b> |                 |                 |              |
| Forearm                    | 0.11 ± 0.13     | 0.50 ± 0.98     | <b>0.045</b> |
| Cheek                      | 0.88 ± 1.56     | 0.61 ± 0.98     | 0.494        |
| Palm                       | 0.06 ± 0.11     | 0.10 ± 0.22     | 0.379        |
| <b>Wrinkles (Sew)</b>      |                 |                 |              |
| Forearm                    | 73.90 ± 21.44   | 81.05 ± 25.71   | 0.361        |
| Cheek                      | 129.91 ± 46.46  | 109.29 ± 41.82  | 0.143        |
| Palm                       | 234.79 ± 77.15  | 291.19 ± 159.31 | 0.121        |
| <b>Surface area (%)</b>    |                 |                 |              |
| Forearm                    | 605.45 ± 61.98  | 628. 46 ± 84.36 | 0.356        |
| Cheek                      | 637.11 ± 80.18  | 681.99 ± 139.20 | 0.183        |
| Palm                       | 463.94 ± 47.31  | 484.10 ± 91.36  | 0.329        |
| <b>Volume (mm³)</b>        |                 |                 |              |
| Forearm                    | 86.12 ± 14.30   | 93.34 ± 15.75   | 0.145        |
| Cheek                      | 105.02 ± 13.31  | 106.74 ± 12.77  | 0.678        |
| Palm                       | 85.55 ± 18.09   | 82.64 ± 22.87   | 0.672        |
| <b>Contrast (AU)</b>       |                 |                 |              |
| Forearm                    | 0.99 ± 0.22     | 1.14 ± 0.35     | 0.146        |
| Cheek                      | 1.15 ± 0.33     | 1.26 ± 0.48     | 0.440        |
| Palm                       | 0.61 ± 0.09     | 0.69 ± 0.29     | 0.169        |

|                                   |                 |                 |              |
|-----------------------------------|-----------------|-----------------|--------------|
| <b>Variance (AU)</b>              |                 |                 |              |
| Forearm                           | 4.09 ± 0.71     | 4.39 ± 0.76     | 0.210        |
| Cheek                             | 4.40 ± 0.68     | 4.71 ± 1.14     | 0.265        |
| Palm                              | 2.76 ± 0.37     | 2.89 ± 0.83     | 0.447        |
| <b>Homogeneity (AU)</b>           |                 |                 |              |
| Forearm                           | 1.41 ± 0.05     | 1.39 ± 0.06     | 0.429        |
| Cheek                             | 1.39 ± 0.06     | 1.38 ± 0.07     | 0.702        |
| Palm                              | 1.54 ± 0.04     | 1.52 ± 0.07     | 0.392        |
| <b>Anisotropy (AU)</b>            |                 |                 |              |
| Forearm                           | 34.72 ± 10.20   | 33.54 ± 12.39   | 0.753        |
| Cheek                             | 29.68 ± 12.54   | 29.02 ± 10.78   | 0.855        |
| Palm                              | 39.53 ± 15.00   | 36.56 ± 15.26   | 0.542        |
| <b>Total number of cells (AU)</b> |                 |                 |              |
| Forearm                           | 121.47 ± 27.70  | 119.97 ± 31.22  | 0.876        |
| Cheek                             | 66.27 ± 23.70   | 66.41 ± 20.19   | 0.983        |
| Palm                              | 80.40 ± 29.99   | 87.48 ± 25.44   | 0.415        |
| <b>Hardness (AU)</b>              |                 |                 |              |
| Forearm                           | 7.92 ± 3.15     | 10.23 ± 4.18    | 0.067        |
| Cheek                             | 9.09 ± 3.55     | 7.35 ± 2.78     | 0.080        |
| Palm                              | 12.65 ± 6.11    | 13.52 ± 4.03    | 0.622        |
| <b>Friction (AU)</b>              |                 |                 |              |
| Forearm                           | 187.05 ± 108.86 | 164.53 ± 82.69  | 0.447        |
| Cheek                             | 137.09 ± 95.22  | 102.39 ± 62.15  | 0.152        |
| Palm                              | 387.64 ± 273.91 | 249.60 ± 224.16 | 0.080        |
| <b>Brightness (AU)</b>            |                 |                 |              |
| Forearm                           | 10.66 ± 14.23   | 7.17 ± 1.13     | 0.359        |
| Cheek                             | 7.02 ± 1.54     | 7.30 ± 1.17     | 0.491        |
| Palm                              | 6.67 ± 1.20     | 7.93 ± 1.27     | <b>0.003</b> |
| <b>Deformability (mm)</b>         |                 |                 |              |
| Forearm                           | 1.46 ± 0.34     | 1.58 ± 0.34     | 0.253        |
| Cheek                             | 1.89 ± 0.24     | 1.89 ± 0.26     | 0.920        |
| Palm                              | 1.38 ± 0.31     | 1.24 ± 0.22     | 0.680        |
| <b>Flaking index (%)</b>          |                 |                 |              |
| Forearm                           | 29.70 ± 9.36    | 33.09 ± 7.44    | 0.198        |
| Cheek                             | 26.06 ± 9.96    | 26.78 ± 12.89   | 0.426        |
| Palm                              | 9.24 ± 7.03     | 12.41 ± 7.02    | 0.162        |

p value based on Student's t-test for independent samples comparing the values of biophysical skin parameters between males and females.

Table S3. Correlation between skin biophysical parameters and age at different body sites.

| Parameter           | Forearm    | Cheek      | Palm              |
|---------------------|------------|------------|-------------------|
| Smoothness (Sesm)   | r = 0.161  | r = -0.027 | r = -0.036        |
|                     | p = 0.295  | p = 0.861  | p = 0.814         |
| Roughness (Ser)     | r = -0.126 | r = -0.074 | r = 0.129         |
|                     | p = 0.417  | p = 0.635  | p = 0.406         |
| Desquamation (Sesc) | r = 0.288  | r = 0.130  | r = 0.191         |
|                     | p = 0.058  | p = 0.401  | p = 0.213         |
| Wrinkles (Sew)      | r = 0.064  | r = -0.099 | r = -0.036        |
|                     | p = 0.678  | p = 0.521  | p = 0.816         |
| Surface area (%)    | r = 0.185  | r = 0.119  | r = <b>0.327*</b> |
|                     | p = 0.228  | p = 0.443  | p = <b>0.030</b>  |

|                            |                                 |                                 |                                             |
|----------------------------|---------------------------------|---------------------------------|---------------------------------------------|
| Volume (mm <sup>3</sup> )  | r = 0.117<br>p = 0.450          | r = 0.221<br>p = 0.149          | r = -0.046<br>p = 0.769                     |
| Contrast (AU)              | r = 0.212<br>p = 0.166          | r = -0.013<br>p = 0.935         | r = <b>0.373*</b><br>p = <b>0.013</b>       |
| Variance (AU)              | r = 0.213<br>p = 0.165          | r = 0.109<br>p = 0.480          | r = <b>0.321*</b><br>p = <b>0.034</b>       |
| Homogeneity (AU)           | r = -0.167<br>p = 0.277         | r = -0.025<br>p = 0.873         | r = <b>-0.389**</b><br>p = <b>0.009</b>     |
| Anisotropy (AU)            | r = 0.038<br>p = 0.807          | r = -0.004<br>p = 0.981         | r = -0.296<br>p = 0.051                     |
| Total number of cells (AU) | r = -0.165<br>p = 0.283         | r = 0.128<br>p = 0.409          | r = 0.137<br>p = 0.375                      |
| Hardness (AU)              | r = 0.045<br>p = 0.774          | r = 0.087<br>p = 0.576          | r = 0.184<br>p = 0.231                      |
| Friction (AU)              | r = 0.046<br>p = 0.764          | r = -0.169<br>p = 0.272         | r = <b>-0.520**</b><br>p = <b>&lt;0.001</b> |
| Brightness (AU)            | r = -0.106<br>p = 0.492         | r = 0.179<br>p = 0.245          | r = <b>0.454**</b><br>p = <b>0.002</b>      |
| Deformability (mm)         | r = 0.099<br>p = 0.522          | r = -0.153<br>p = 0.322         | r = -0.168<br>p = 0.276                     |
| Flaking index (%)          | r = <b>0.388**</b><br>p = 0.009 | r = <b>-0.305*</b><br>p = 0.044 | r = 0.290<br>p = 0.056                      |

r = Pearson's Correlation Coefficient; p = Bilateral significance (p); \* Correlation is significant at the 0.05 ± bilateral level; \*\* Correlation is significant at the 0.01 ± bilateral level.

Table S4. Skin biophysical parameters in smokers vs. non-smokers.

| Parameter                      | Smokers (n=14)   | Non-smokers (n=30) | p            |
|--------------------------------|------------------|--------------------|--------------|
| <b>Smoothness (Sesm)</b>       |                  |                    |              |
| Forearm                        | 222.37 ± 72.45   | 248.23 ± 75.45     | 0.143        |
| Cheek                          | 337.50 ± 111.13  | 353.13 ± 125.44    | 0.340        |
| Palm                           | 414.07 ± 228.60  | 405.45 ± 104.67    | <b>0.012</b> |
| <b>Roughness (Ser)</b>         |                  |                    |              |
| Forearm                        | 2.84 ± 2.06      | 2.27 ± 1.55        | 0.182        |
| Cheek                          | 3.20 ± 0.92      | 3.84 ± 2.64        | 0.104        |
| Palm                           | 3.30 ± 1.65      | 2.97 ± 1.41        | 0.258        |
| <b>Desquamation (Sesc)</b>     |                  |                    |              |
| Forearm                        | 0.24 ± 0.35      | 0.43 ± 0.96        | 0.168        |
| Cheek                          | 0.56 ± 0.70      | 0.77 ± 1.38        | 0.251        |
| Palm                           | 0.15 ± 0.27      | 0.06 ± 0.13        | 0.069        |
| <b>Wrinkles (Sew)</b>          |                  |                    |              |
| Forearm                        | 76.77 ± 28.25    | 79.47 ± 22.75      | 0.378        |
| Cheek                          | 112.94 ± 42.57   | 117.90 ± 45.34     | 0.363        |
| Palm                           | 256.83 ± 203.43  | 279.03 ± 98.73     | 0.352        |
| <b>Surface area (%)</b>        |                  |                    |              |
| Forearm                        | 607.65 ± 60.04   | 626.67 ± 84.69     | 0.200        |
| Cheek                          | 670. 21 ± 110.38 | 665.05 ± 130.50    | 0.455        |
| Palm                           | 516.61 ± 97.05   | 458.60 ± 62.88     | 0.098        |
| <b>Volume (mm<sup>3</sup>)</b> |                  |                    |              |
| Forearm                        | 87.30 ± 14.16    | 92.55 ± 16.03      | 0.141        |

|                                   |                 |                 |              |
|-----------------------------------|-----------------|-----------------|--------------|
| Cheek                             | 109.36 ± 9.40   | 104.66 ± 14.04  | 0.077        |
| Palm                              | 89.34 ± 16.52   | 80.98 ± 22.82   | 0.089        |
| <b>Contrast (AU)</b>              |                 |                 |              |
| Forearm                           | 1.05 ± 0.21     | 1.12 ± 0.35     | 0.213        |
| Cheek                             | 1.27 ± 0.43     | 1.20 ± 0.45     | 0.677        |
| Palm                              | 0.77 ± 0.35     | 0.62 ± 0.17     | <b>0.047</b> |
| <b>Variance (AU)</b>              |                 |                 |              |
| Forearm                           | 4.19 ± 0.54     | 4.34 ± 0.83     | 0.249        |
| Cheek                             | 4.63 ± 0.90     | 4.59 ± 1.07     | 0.452        |
| Palm                              | 3.20 ± 0.86     | 2.69 ± 0.57     | <b>0.028</b> |
| <b>Homogeneity (AU)</b>           |                 |                 |              |
| Forearm                           | 1.40 ± 0.05     | 1.39 ± 0.06     | 0.258        |
| Cheek                             | 1.37 ± 0.05     | 1.38 ± 0.73     | 0.225        |
| Palm                              | 1.50 ± 0.075    | 1.54 ± 0.05     | <b>0.037</b> |
| <b>Anisotropy (AU)</b>            |                 |                 |              |
| Forearm                           | 32.04 ± 11.59   | 34.84 ± 11.67   | 0.232        |
| Cheek                             | 28.64 ± 11.64   | 29.53 ± 11.28   | 0.407        |
| Palm                              | 32.56 ± 15.52   | 39.90 ± 14.51   | 0.074        |
| <b>Total number of cells (AU)</b> |                 |                 |              |
| Forearm                           | 118.80 ± 27.96  | 124.07 ± 34.10  | 0.309        |
| Cheek                             | 62.57 ± 20.71   | 68.13 ± 21.50   | 0.210        |
| Palm                              | 82.43 ± 26.06   | 86.30 ± 27.69   | 0.328        |
| <b>Hardness (AU)</b>              |                 |                 |              |
| Forearm                           | 9.77 ± 3.82     | 9.28 ± 4.10     | 0.352        |
| Cheek                             | 7.87 ± 2.46     | 7.97 ± 3.44     | 0.639        |
| Palm                              | 13.61 ± 5.12    | 13.04 ± 4.71    | 0.365        |
| <b>Friction (AU)</b>              |                 |                 |              |
| Forearm                           | 170.23 ± 98.95  | 173.13 ± 90.01  | 0.463        |
| Cheek                             | 113.63 ± 92.21  | 114.50 ± 68.60  | 0.488        |
| Palm                              | 285.07 ± 280.38 | 302.07 ± 236.40 | 0.423        |
| <b>Brightness (AU)</b>            |                 |                 |              |
| Forearm                           | 6.98 ± 0.92     | 11.33 ± 14.64   | <b>0.007</b> |
| Cheek                             | 7.16 ± 1.41     | 7.23 ± 1.27     | 0.443        |
| Palm                              | 7.51 ± 1.71     | 7.50 ± 1.22     | 0.106        |
| <b>Deformability (mm)</b>         |                 |                 |              |
| Forearm                           | 1.48 ± 0.38     | 1.57 ± 0.33     | 0.242        |
| Cheek                             | 1.87 ± 0.27     | 1.90 ± 0.25     | 0.372        |
| Palm                              | 1.24 ± 0.23     | 1.31 ± 0.27     | 0.190        |
| <b>Flaking index (%)</b>          |                 |                 |              |
| Forearm                           | 62.16 ± 10.41   | 58.70 ± 13.42   | <b>0.041</b> |
| Cheek                             | 56.27 ± 20.42   | 52.45 ± 15.91   | 0.061        |
| Palm                              | 29.57 ± 16.11   | 25.40 ± 14.48   | 0.209        |

p value based on Student's t-test for independent samples comparing the values of biophysical skin parameters between smokers and non-smokers.

Table S5. Skin biophysical parameters in alcohol users vs. non-alcohol users.

| Parameter                | Alcohol users<br>(n=22) | Non-alcohol user<br>(n=22) | p     |
|--------------------------|-------------------------|----------------------------|-------|
| <b>Smoothness (Sesm)</b> |                         |                            |       |
| Forearm                  | 229.54 ± 58.94          | 250.49 ± 87.82             | 0.086 |
| Cheek                    | 347.65 ± 130.42         | 348.66 ± 111.69            | 0.606 |

|                                   |                 |                 |                   |
|-----------------------------------|-----------------|-----------------|-------------------|
| Palm                              | 435.86 ± 120.60 | 380.53 ± 177.10 | 0.117             |
| <b>Roughness (Ser)</b>            |                 |                 |                   |
| Forearm                           | 2.10 ± 1.14     | 2.80 ± 2.13     | 0.046             |
| Cheek                             | 3.61 ± 2.63     | 3.66 ± 1.83     | 0.288             |
| Palm                              | 2.92 ± 1.18     | 3.23 ± 1.74     | 0.074             |
| <b>Desquamation (Sesc)</b>        |                 |                 |                   |
| Forearm                           | 0.39 ± 1.09     | 0.35 ± 0.44     | 0.431             |
| Cheek                             | 0.73 ± 1.28     | 0.67 ± 1.14     | 0.433             |
| Palm                              | 0.06 ± 0.11     | 0.11 ± 0.25     | 0.069             |
| <b>Wrinkles (Sew)</b>             |                 |                 |                   |
| Forearm                           | 74.18 ± 19.87   | 74.18 ± 19.87   | 0.108             |
| Cheek                             | 114.81 ± 48.81  | 117.84 ± 39.80  | 0.176             |
| Palm                              | 281.33 ± 96.10  | 262.60 ± 172.87 | 0.145             |
| <b>Surface area (%)</b>           |                 |                 |                   |
| Forearm                           | 622.77 ± 91.10  | 618.46 ± 63.18  | 0.402             |
| Cheek                             | 675.32 ± 127.98 | 658.07 ± 120.56 | 0.308             |
| Palm                              | 465.86 ± 43.05  | 488.26 ± 103.47 | 0.148             |
| <b>Volume (mm³)</b>               |                 |                 |                   |
| Forearm                           | 87.52 ± 14.92   | 94.24 ± 15.65   | 0.949             |
| Cheek                             | 105.87 ± 13.83  | 106.44 ± 12.06  | 0.443             |
| Palm                              | 86.08 ± 19.29   | 81.20 ± 23.14   | 0.760             |
| <b>Contrast (AU)</b>              |                 |                 |                   |
| Forearm                           | 1.11 ± 0.38     | 1.08 ± 0.24     | 0.421             |
| Cheek                             | 1.30 ± 0.52     | 1.15 ± 0.31     | 0.238             |
| Palm                              | 0.61 ± 0.11     | 0.72 ± 0.33     | 0.162             |
| <b>Variance (AU)</b>              |                 |                 |                   |
| Forearm                           | 4.29 ± 0.90     | 4.29 ± 0.57     | 0.328             |
| Cheek                             | 4.68 ± 1.08     | 4.52 ± 0.96     | 0.208             |
| Palm                              | 2.74 ± 0.38     | 2.96 ± 0.92     | 0.155             |
| <b>Homogeneity (AU)</b>           |                 |                 |                   |
| Forearm                           | 1.40 ± 0.07     | 1.40 ± 0.49     | 0.391             |
| Cheek                             | 1.37 ± 0.08     | 1.39 ± 0.05     | 0.541             |
| Palm                              | 1.54 ± 0.03     | 1.52 ± 0.08     | 0.279             |
| <b>Anisotropy (AU)</b>            |                 |                 |                   |
| Forearm                           | 33.51 ± 13.56   | 34.38 ± 9.52    | 0.06              |
| Cheek                             | 27.37 ± 10.66   | 31.11 ± 11.79   | 0.138             |
| Palm                              | 37.09 ± 16.10   | 38.06 ± 14.32   | 0.586             |
| <b>Total number of cells (AU)</b> |                 |                 |                   |
| Forearm                           | 128.23 ± 30.16  | 112.73 ± 27.87  | 0.359             |
| Cheek                             | 63.95 ± 23.33   | 68.77 ± 19.01   | 0.100             |
| Palm                              | 85.82 ± 23.57   | 84.32 ± 30.49   | 0.158             |
| <b>Hardness (AU)</b>              |                 |                 |                   |
| Forearm                           | 9.88 ± 3.93     | 9.00 ± 4.06     | 0.490             |
| Cheek                             | 7.97 ± 3.35     | 7.91 ± 2.99     | 0.476             |
| Palm                              | 12.92 ± 5.39    | 13.52 ± 4.21    | 0.116             |
| <b>Friction (AU)</b>              |                 |                 |                   |
| Forearm                           | 169.22 ± 95.91  | 175.20 ± 89.65  | 0.687             |
| Cheek                             | 135.97 ± 93.13  | 92.48 ± 45.79   | <b>0.002</b>      |
| Palm                              | 407.65 ± 283.95 | 185.67 ± 139.78 | <b>&lt; 0.001</b> |
| <b>Brightness (AU)</b>            |                 |                 |                   |
| Forearm                           | 9.58 ± 7.14     | 9.58 ± 11.76    | 0.094             |
| Cheek                             | 7.08 ± 1.20     | 7.33 ± 1.40     | 0.273             |
| Palm                              | 7.04 ± 1.09     | 7.96 ± 1.49     | 0.184             |

|                           |               |               |              |
|---------------------------|---------------|---------------|--------------|
| <b>Deformability (mm)</b> |               |               |              |
| Forearm                   | 1.48 ± 0.33   | 1.60 ± 0.35   | 0.127        |
| Cheek                     | 1.86 ± 0.26   | 1.92 ± 0.25   | 0.238        |
| Palm                      | 1.29 ± 0.22   | 1.28 ± 0.29   | 0.386        |
| <b>Flaking index (%)</b>  |               |               |              |
| Forearm                   | 33.11 ± 7.94  | 30.76 ± 8.47  | 0.150        |
| Cheek                     | 29.32 ± 13.28 | 23.75 ± 9.76  | <b>0.039</b> |
| Palm                      | 29.83 ± 12.37 | 23.63 ± 16.87 | 0.083        |

p value based on Student's t-test for independent samples comparing the values of biophysical skin parameters between alcohol users and non-alcohol users.

22  
23

24  
25
